# Supplementary material for: 6-Gingerol Normalizes the Expression of Biomarkers Related to Hypertension via PPARδ in HUVECs, HEK293, and Differentiated 3T3-L1 Cells
Source: Hindawi journal article supplement (doi:10.1155/2018/6485064), 2018-12-16

## Additional Figure legend

### Additional Figure. The effects of 6-gingerol on mRNA levels PPAR $\delta$ and MCP-1 in CPAE cells in pathological condition.

6-Gingerol increased the mRNA level of PPAR $\delta$  decreased by cholesterol in CPAE cells. The 6-gingerol decreased the mRNA level of MCP-1 elevated by cholesterol treatment in CPAE cells. The results are expressed as means  $\pm$  SEM. Values were statistically analyzed by unpaired *t*-test. All experiments were repeated over three times. \*\*  $p < 0.01$ , \*\*\*  $p < 0.001$ . Meaning of indications: Ctrl is an untreated control group, C means cholesterol treated group, CG means cholesterol and 6-gingerol treated group.

### Additional Figure

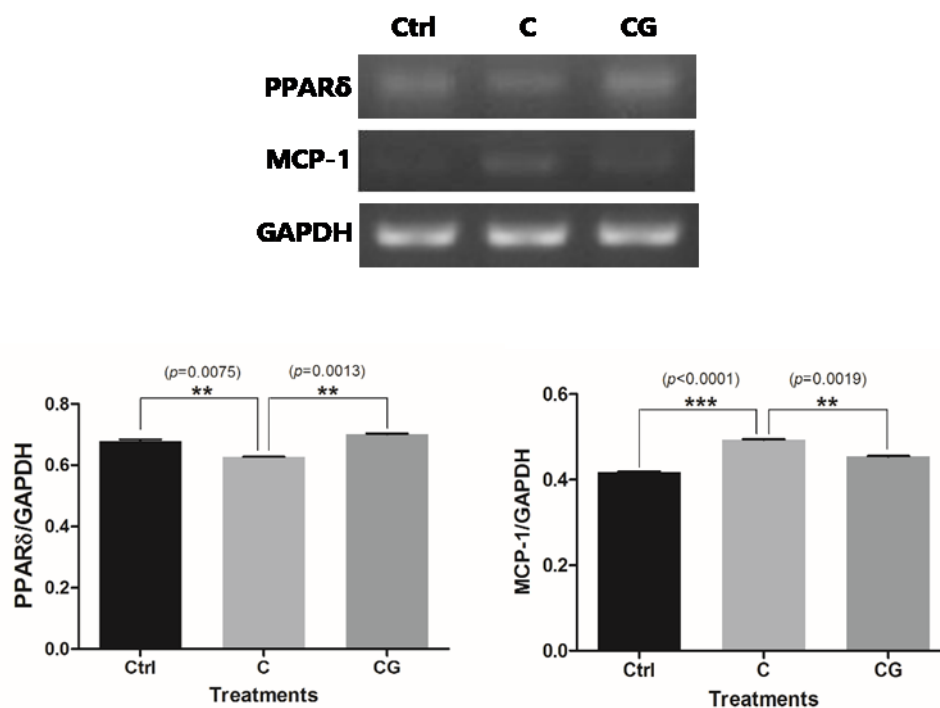

Supplement: f1 [file 6485064.f1.pdf]
